# Supplementary material
Source: publisher figshare collection journal article supplement (https://tandf.figshare.com/articles/dataset/_/8870432)
Supplement: Supplementary file 1 [file 1]

```

HE586506_Monodus_UTEX_B_SNO83      TGCCTCAGTGTCGGTTTCACCCCTCGCCTCTCC-CACCTCCGGTGGTGAGAAGAGCGGACC
AY333646_Coccoomyxa_glaronensis_T  TGCCTCAGTGTCGGTTTCACCCCTCGCCTCACCTCCCATCCGGTTGCGTG-AGAGCGGACC
*****
HE586506_Monodus_UTEX_B_SNO83      TGGCCGTCCCGATCCAGGCGATCGGGTCGGCTGAAGCGCAGAGGCTTGAGCGGGAGTCCC
AY333646_Coccoomyxa_glaronensis_T  TGGCCGTCCCGATCCAGGCGATCGGGTCGGCTGAAGCGCAGAGGCTTGAGCGGGAGTCCC
*****
HE586506_Monodus_UTEX_B_SNO83      TCCAATGCGGGAACAACAGACCGGTAGGTGAGCCG-----TCCGGAAGGACGATCGCA
AY333646_Coccoomyxa_glaronensis_T  TCCAATGTGGGAACAACAGACCGGTAGGTGAGCCGTCTCTCTCCGGAGAGACGATCGCA
*****
HE586506_Monodus_UTEX_B_SNO83      TGCCGCTGCTGGGCCCCGGGACCCGCTGGACGCCGAGCAGGAGACGGTGCGGCTCGCGA
AY333646_Coccoomyxa_glaronensis_T  TGCCGCTGCTGGGCCCCGGGACCCGCTGGACGCCGAGCAGGANACGGTGCGGC-----
*****
HE586506_Monodus_UTEX_B_SNO83      CGGGGGCGACCCAGTCGCAGCGACCGACCATCATCCAT
AY333646_Coccoomyxa_glaronensis_T  -----

AY333646_Coccoomyxa_glaronensis_T  TGCCTCAGTGTCGGTTTCACCCCTCGCCTCACCTCCCATCCGGTTGCGTGAGAGCGGACCT
HE586548_Coccoomyxa_KN_2011_S2     TGCCTCAGTGTCGGTTTCACCCCTCGCCTCACCTCCCATCCGGTTGCGTGAGAGCGGACCT
HE586508_Coccoomyxa_sp_KN_2011_C4  TGCCTCAGTGTCGGTTTCACCCCTCGCCTCACCTCCCATCCGGTTGCGTGAGAGCGGACCT
HE586528_Coccoomyxa_KN_2011_C2     TGCCTCAGTGTCGGTTTCACCCCTCGCCTCACCTCCCATCCGGTTGCGTGAGAGCGGACCT
HE586529_Coccoomyxa_KN_2011_C3     TGCCTCAGTGTCGGTTTCACCCCTCGCCTCACCTCCCATCCGGTTGCGTGAGAGCGGACCT
*****
AY333646_Coccoomyxa_glaronensis_T  GGCCGTCCCGATCCCTGCGGATCGGGTCGGCTGAAGCGCAGAGGCTTGAGCGGGAGTCCC-
HE586548_Coccoomyxa_KN_2011_S2     GGCCGTCCCGATCCCTGCGGATCGGGTCGGCTGAAGMGCAGAGGCTTGAGCGGGAGTCCC-
HE586508_Coccoomyxa_sp_KN_2011_C4  GGCCGTCCCGATCCCTGCGGATCGGGTCGGCTGAAGCGCAGAGGCTTGAGCGGGAGTCCCT
HE586528_Coccoomyxa_KN_2011_C2     GGCCGTCCCGATCCCTGCGGATCGGGTCGGCTGAAGCRCAGAGGCTTGAGCGGGAGTCCCT
HE586529_Coccoomyxa_KN_2011_C3     GGCCGTCCCGATCCCTGCGGATCGGGTCGGCTGAAGCRCAGAGGCTTGAGCGGGAGTCCC-
*****
AY333646_Coccoomyxa_glaronensis_T  TCCAATGTGGGAACAACAGACCGGTAGGTGAGCCGTCTCTCTCCGGAGAGACGATCGCA
HE586548_Coccoomyxa_KN_2011_S2     TCTAACGTGGGAACAACAGACCGGTAGGTGAGCCGTCTCTCTCCGGAGAGACGATCGCA
HE586508_Coccoomyxa_sp_KN_2011_C4  TCTAACGTGGGAACAACAGACCGGTAGGTGAGCCGTCTCTCTCCGGAGAGACGATCGCA
HE586528_Coccoomyxa_KN_2011_C2     TCTAACGTGGGAACAACAGACCGGTAGGTGAGCCGTCTCTCTCCGGAGAGACGATCGCA
HE586529_Coccoomyxa_KN_2011_C3     TCTAACGTGGGAACAACAGACCGGTAGGTGAGCCGTCTCTCTCCGGAGAGACGATCGCA
** **
AY333646_Coccoomyxa_glaronensis_T  TGCCGCTGCTGGGCCCCGGGACCCGCTGGACGCCGAGCAGGANACGGTGCGGC-----
HE586548_Coccoomyxa_KN_2011_S2     TGCCGCTGCTGGGCCCCGGGACCCGCTGGACGCCGAGCAGGAGACGGTGCGGCTCGCGA
HE586508_Coccoomyxa_sp_KN_2011_C4  TGCCGCTGCTGGGCCCCGGGACCCGCTGGACGCCGAGCAGGAGACGGTGCGGCTCGCGA
HE586528_Coccoomyxa_KN_2011_C2     TGCCGCTGCTGGGCCCCGGGACCCGCTGGACGCCGAGCAGGAGACGGTGCGGCTCGCGA
HE586529_Coccoomyxa_KN_2011_C3     TGCCGCTGCTGGGCCCCGGGACCCGCTGGACGCCGAGCAGGAGACGGTGCGGCTCGCGA
*****
AY333646_Coccoomyxa_glaronensis_T  -----
HE586548_Coccoomyxa_KN_2011_S2     CGGGGGAGACCCCGTCGCGGCGGCCGAATCATCCATTCGACCTGAGTCAGGCAAG
HE586508_Coccoomyxa_sp_KN_2011_C4  CGGGGGAGACCCCGTCGCGGCGGCCGAATCATCCATTCG-----
HE586528_Coccoomyxa_KN_2011_C2     CGGGGGAGACCCCGTCGCGGCGGCCGAATCATCCATTCGACC-----
HE586529_Coccoomyxa_KN_2011_C3     CGGGGGAGACCCCGTCGCGGCGGCCGAATCATCCATTCGACCTGAGTCAGGCAAA-

```

Legend: 5.8S/LSU stem

Helix I

Helix II

Helix III

Helix IV
