# Supplementary material
Source: publisher figshare collection journal article supplement (https://tandf.figshare.com/articles/dataset/_/8870432)
Supplement: Supplementary file 3 [file 1]

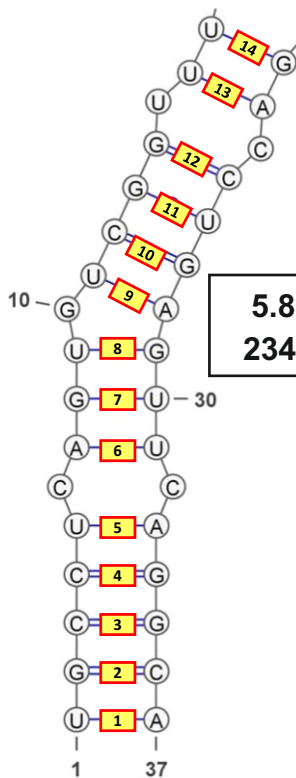

**5.8S/LSU stem:**  
**23442156245326**

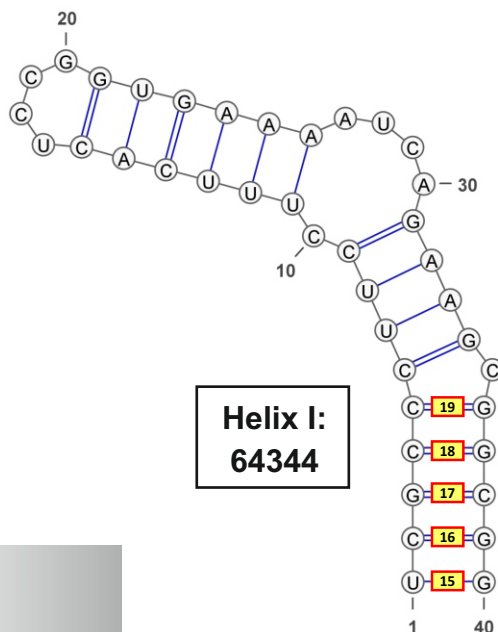

**Helix I:**  
**64344**

### BARCODE LEGEND:

1 = A-U    5 = G•U  
2 = U-A    6 = U•G  
3 = G-C    7 = mismatch  
4 = C-G    8 = deletion, single  
             or unpaired bases

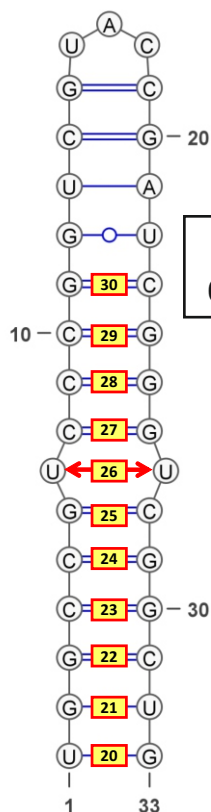

**Helix II:**  
**65344374443**

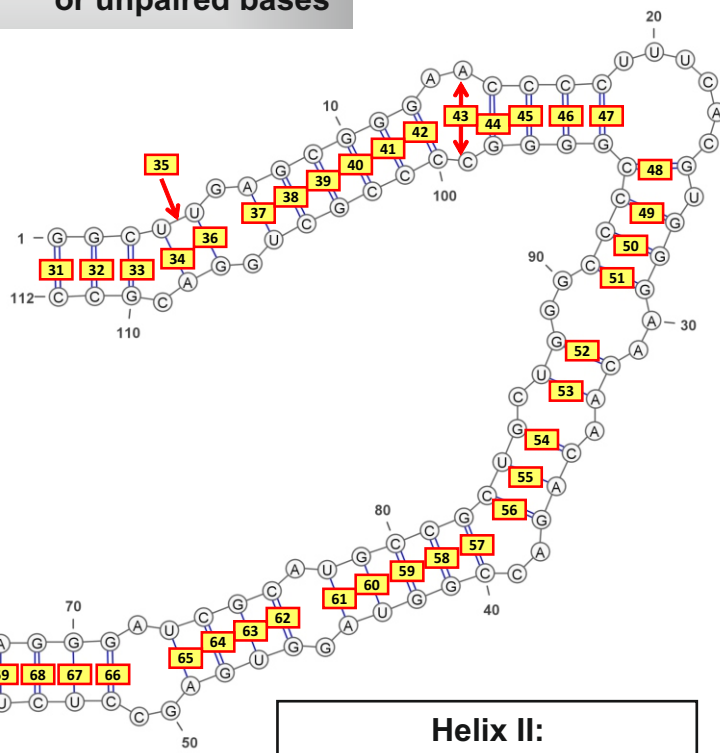

**Helix II:**  
**3342861343338444433334**  
**141343361363146424424**
